# Supplementary material for: Design and synthesis of lipid-mimetic cationic iridium complexes and their liposomal formulation for in vitro and in vivo application in luminescent bioimaging
Source: Royal Society of Chemistry journal article supplement (doi:10.1039/d0ra01114b), 2020-01-01
Supplement: d0ra01114b1.pdf [file d0ra01114b1.pdf]

## Electronic Supporting Information

for the article

### Design and Synthesis of Lipid-Mimetic Organometallic Complexes and their Liposomal Formulation for *in vitro* and *in vivo* Application in Luminescent Bioimaging

Julia R. Shakirova,<sup>1</sup> Amir Sadeghi,<sup>2</sup> Alla A. Koblova,<sup>1</sup> Pavel S. Chelushkin,<sup>1</sup> Elisa Toropainen,<sup>2</sup> Leena-Stiina Kontturi,<sup>3</sup> Tatu Lajunen,<sup>3,4</sup> Sergey P. Tunik,\*<sup>1</sup> Arto Urtti\*<sup>1,2,3</sup>

---

<sup>1</sup> *St. Petersburg State University, Institute of Chemistry, Universitetskii pr., 26, 198504 St. Petersburg, Russia. E-mail: sergey.tunik@spbu.ru*

<sup>2</sup> *School of Pharmacy, Faculty of Health Sciences, University of Eastern Finland, Yliopistonranta 1C, 70211 Kuopio, Finland. E-mail: arto.urtti@uef.fi*

<sup>3</sup> *Drug Research Program, Faculty of Pharmacy, University of Helsinki, Viikinkaari 5 E, 00710 Helsinki, Finland*

<sup>4</sup> *Laboratory of Pharmaceutical Technology, Department of Pharmaceutical Science, Tokyo University of Pharmacy & Life Sciences, 1432-1 Hachioji 192-0392, Tokyo, Japan*

”

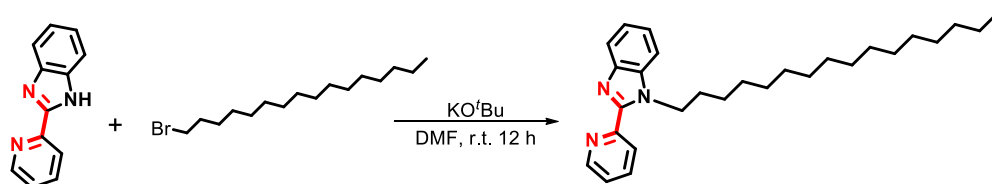

Scheme S1. Synthesis of pyridine-benzimidazole ligand with inserted C<sub>16</sub> aliphatic chain.

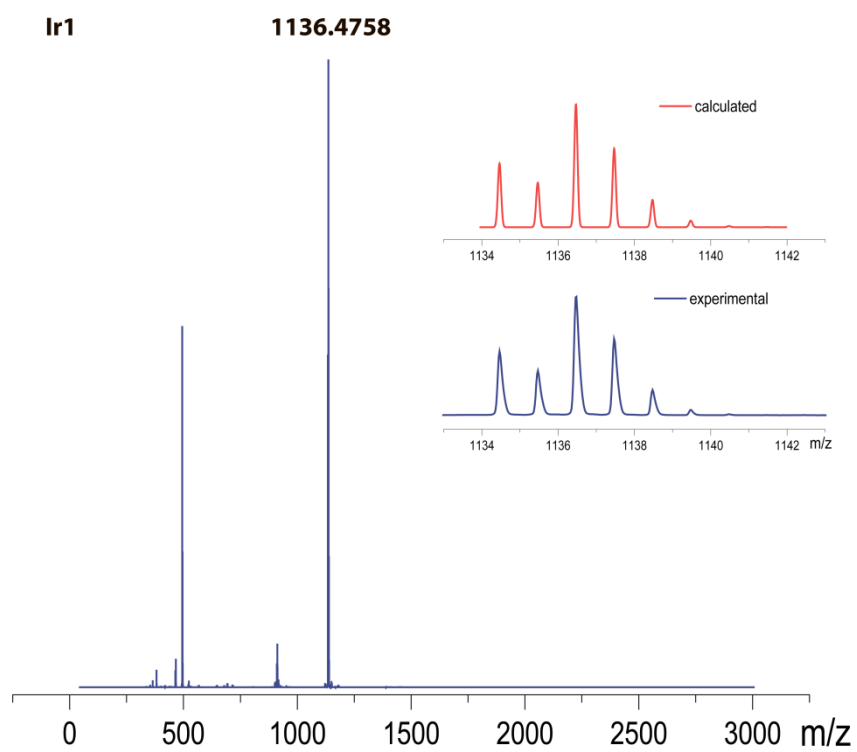

Figure S1. Experimental and calculated ESI<sup>+</sup> mass-spectra of **Ir1**.

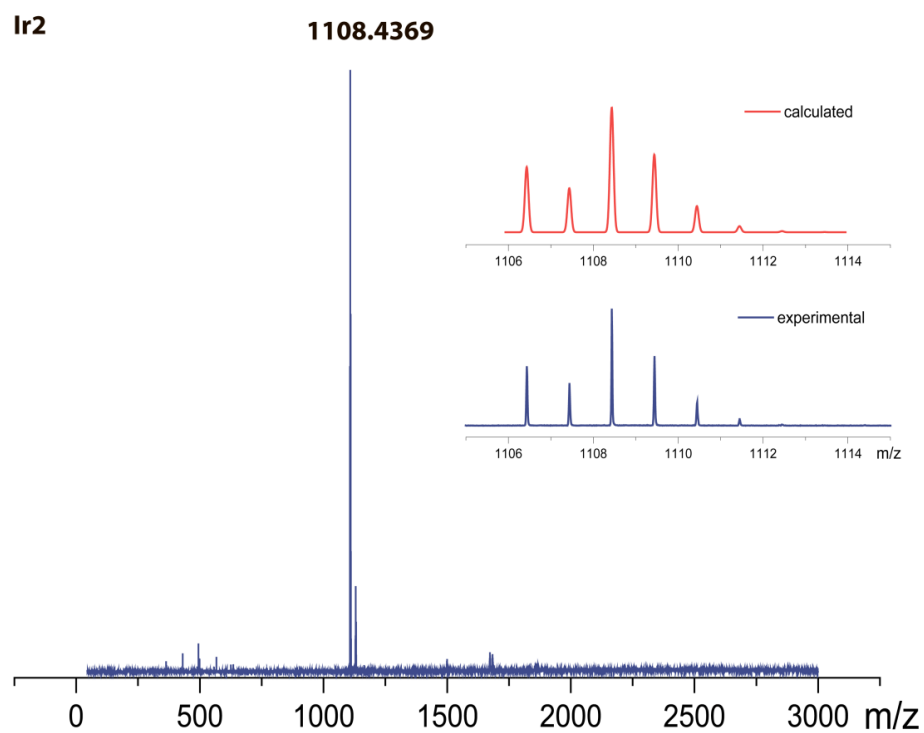

Figure S2. Experimental and calculated ESI<sup>+</sup> mass-spectra of **Ir2**.



Figure S4.  $^1\text{H}$  NMR spectrum of **Ir2**, DMSO- $d_6$ , 298K.

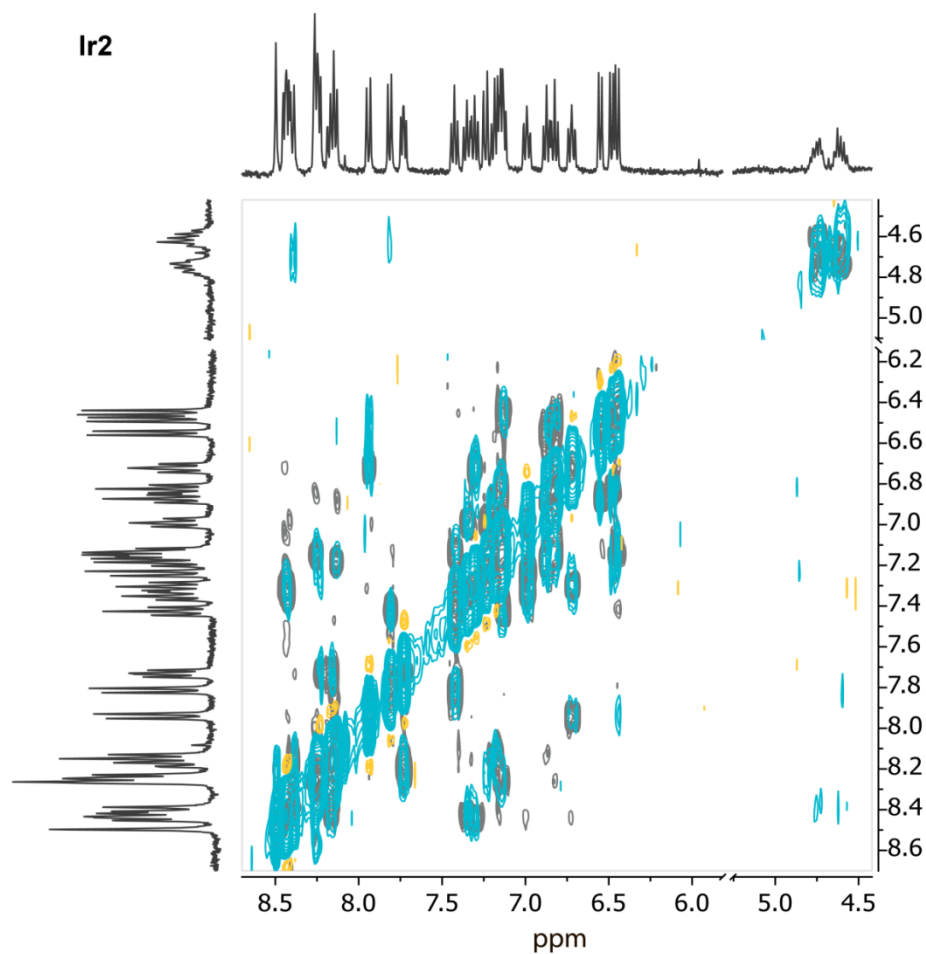

Figure S5. The overlay of the  $^1\text{H}$ - $^1\text{H}$  COSY (grey color)/NOESY (cyan and orange color) spectra of **Ir2**, DMSO- $d_6$ , 298 K.

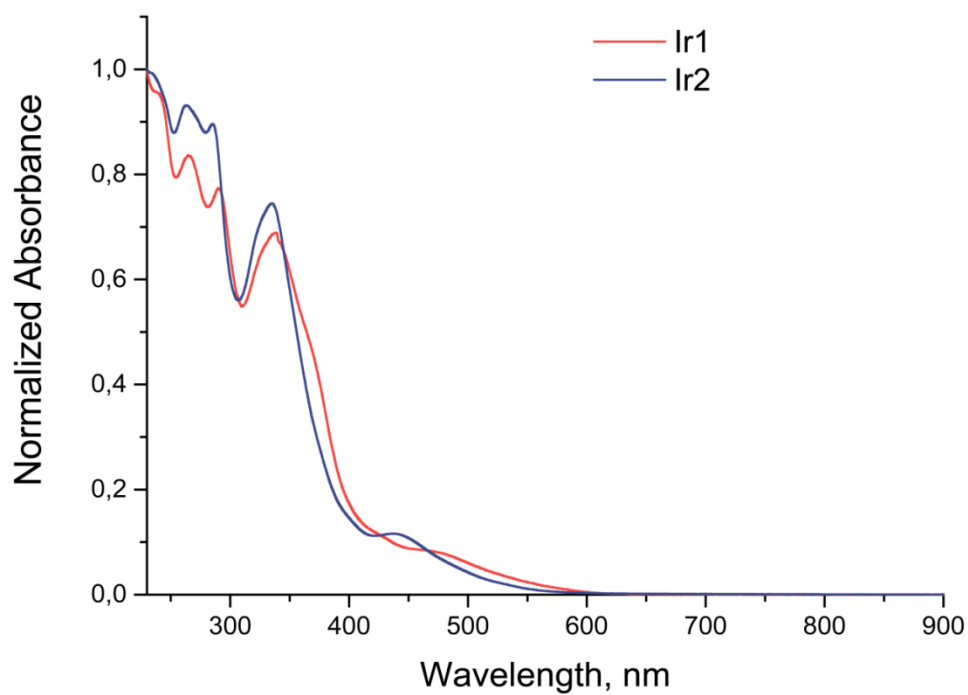

Figure S6. Normalized absorption spectra of complexes **Ir1**, **Ir2** in methanol solution.

**A**

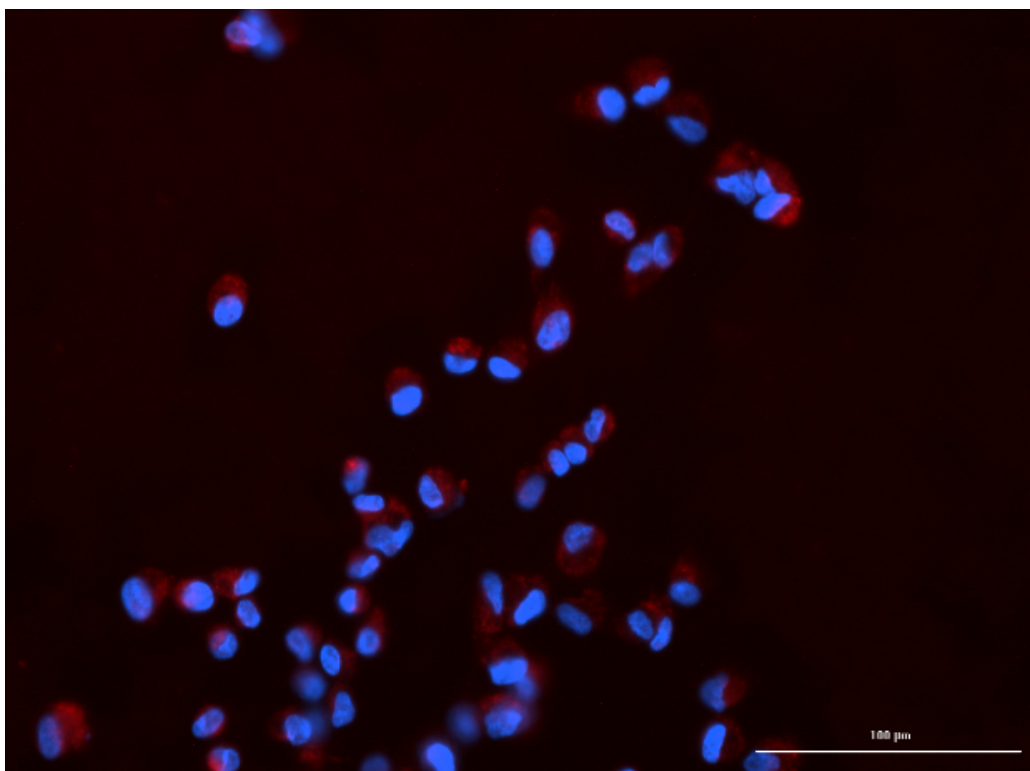

**B**

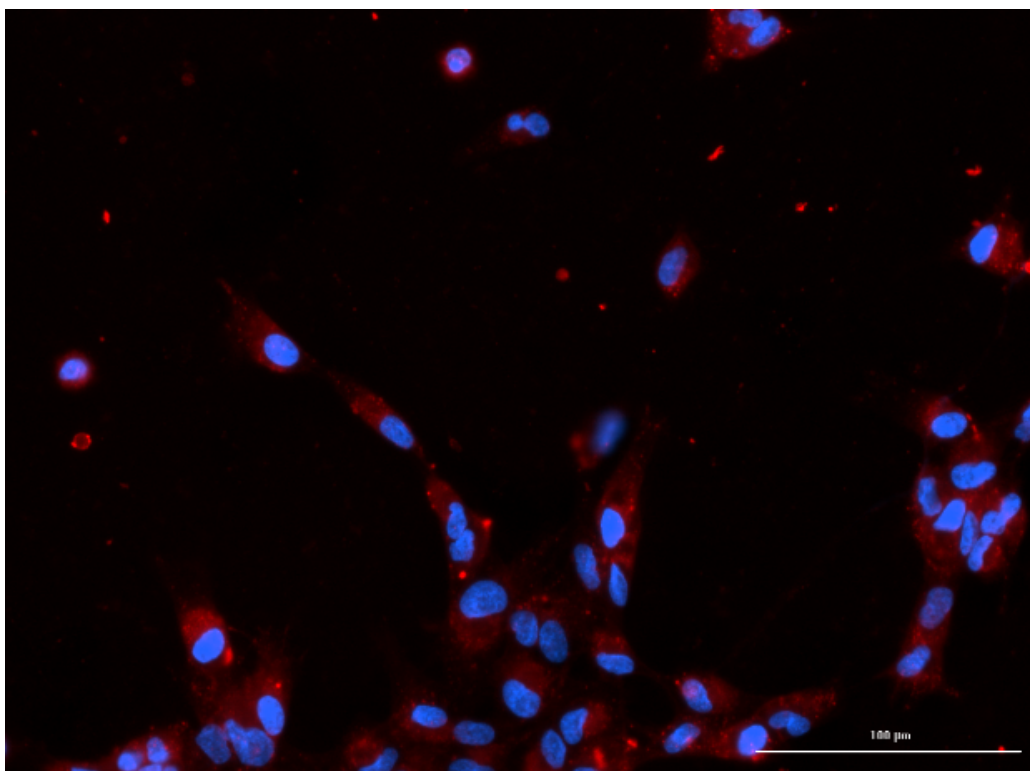

Figure S7. Microphotographs of ARPE-19 cells stained with **Ir1** (red, panel A), **Ir2** (red, panel B), and Hoerchst (blue, panels A-B). Lipid concentration: 0.3  $\mu\text{mol/mL}$ . Magnification: 20x. Scale bar: 100  $\mu\text{m}$ .
